# Supplementary material
Source: Research Square preprint supplement (doi:10.21203/rs.3.rs-9805107/v1)
Supplement: Supplementary file 1 [file 3d1aa20ec514332956d3b07e.docx]

**Regional Epidemiology and Molecular Drivers of Carbapenem Resistance in the Arabian Peninsula and Horn of Africa**

**Table of content**

- Supplementary table 1. PRISMA checklist
- Supplementary table 2: Search strategy
- Supplementary table 3: Quality Assessment of included studies by JBI critical appraisal checklist
- Supplementary table 4. Summary Analysis and pet_peese_summary
- Supplementary table 6: Leave-One-Out Meta-Analysis
- Supplementary Figure 1. Funnel plot assessing publication bias
- Supplementary table 7. Overall Gene Frequency Summary (All Studies): proportional distribution

**Supplementary table 1. PRISMA checklist**

| **Section/topic** | **#** | **Checklist item** | **Reported on** | |
| --- | --- | --- | --- | --- |
| **TITLE** | | |  | |
| Title | 1 | Identify the report as a systematic review. | Title page | |
| **ABSTRACT** | | |  | |
| Abstract | 2 | Provide a structured summary including, as applicable: background; objectives; data sources; study eligibility criteria, participants, and interventions; study appraisal and synthesis methods; results; limitations; conclusions and implications of key findings; systematic review registration number. | Abstract | |
| **INTRODUCTION** | | |  | |
| Rationale | 3 | Describe the rationale for the review in the context of existing knowledge. | Introduction | |
| Objectives | 4 | Provide an explicit statement of the objective(s) or question(s) the review addresses. | Introduction | |
| **METHODS** | | |  | |
| Eligibility criteria | 5 | Specify the inclusion and exclusion criteria for the review and how studies were grouped for the syntheses. | Methods; Eligibility criteria | |
| Information sources | 6 | Specify all databases, registers, websites, organisations, reference lists and other sources searched or consulted to identify studies. Specify the date when each source was last searched or consulted. | Methods; Search Strategy | |
| Search strategy | 7 | Present the full search strategies for all databases, registers and websites, including any filters and limits used. | Supplementary materials Table S2 | |
| Selection process | 8 | Specify the methods used to decide whether a study met the inclusion criteria of the review, including how many reviewers screened each record and each report retrieved, whether they worked independently, and if applicable, details of automation tools used in the process. | Methods; Search Strategy | |
| Data collection process | 9 | Specify the methods used to collect data from reports, including how many reviewers collected data from each report, whether they worked independently, any processes for obtaining or confirming data from study investigators, and if applicable, details of automation tools used in the process. | Methods; Data Extraction and Synthesis | |
| Data items | 10a | List and define all outcomes for which data were sought. Specify whether all results that were compatible with each outcome domain in each study were sought (e.g. for all measures, time points, analyses), and if not, the methods used to decide which results to collect. | Methods; Data Extraction and Synthesis | |
| 10b | List and define all other variables for which data were sought (e.g. participant and intervention characteristics, funding sources). Describe any assumptions made about any missing or unclear information. | Methods; Data Extraction and Synthesis | |
| Study risk of bias assessment | 11 | Specify the methods used to assess risk of bias in the included studies, including details of the tool(s) used, how many reviewers assessed each study and whether they worked independently, and if applicable, details of automation tools used in the process. | Methods; Quality Assessment | |
| Effect measures | 12 | Specify for each outcome the effect measure(s) (e.g. risk ratio, mean difference) used in the synthesis or presentation of results. | Methods; Data Extraction and Synthesis | |
| Synthesis methods | 13a | Describe the processes used to decide which studies were eligible for each synthesis (e.g. tabulating the study intervention characteristics and comparing against the planned groups for each synthesis (item #5)). | Methods; Eligibility criteria | |
| 13b | Describe any methods required to prepare the data for presentation or synthesis, such as handling of missing summary statistics, or data conversions. | Methods; Quality Assessment | |
| 13c | Describe any methods used to tabulate or visually display results of individual studies and syntheses. | Methods; Data Extraction and Synthesis | |
| 13d | Describe any methods used to synthesize results and provide a rationale for the choice(s). If meta-analysis was performed, describe the model(s), method(s) to identify the presence and extent of statistical heterogeneity, and software package(s) used. | Methods; Data Extraction and Synthesis | |
| 13e | Describe any methods used to explore possible causes of heterogeneity among study results (e.g. subgroup analysis, meta-regression). | Methods; Data Extraction and Synthesis | |
| 13f | Describe any sensitivity analyses conducted to assess robustness of the synthesized results. | Methods; Data Extraction and Synthesis | |
| Reporting bias assessment | 14 | Describe any methods used to assess risk of bias due to missing results in a synthesis (arising from reporting biases). | Methods; Data Extraction and Synthesis | |
| Certainty assessment | 15 | Describe any methods used to assess certainty (or confidence) in the body of evidence for an outcome. | Methods; Data Extraction and Synthesis | |
| **RESULTS** | | |  | |
| Study selection | 16a | Describe the results of the search and selection process, from the number of records identified in the search to the number of studies included in the review, ideally using a flow diagram. | Results; Search Results; Figure 1 | |
| 16b | Cite studies that might appear to meet the inclusion criteria, but which were excluded, and explain why they were excluded. | Supplementary materials; | |
| Study characteristics | 17 | Cite each included study and present its characteristics. | Results; Table 1 | |
| Risk of bias in studies | 18 | Present assessments of risk of bias for each included study. | Supplementary materials; Table 3 | |
| Results of individual studies | 19 | For all outcomes, present, for each study: (a) summary statistics for each group (where appropriate) and (b) an effect estimate and its precision (e.g. confidence/credible interval), ideally using structured tables or plots. | Results; Table 1, Figure 2; Supplementary materials; Tab 4-6. F 1 – 6 | |
| Results of syntheses | 20a | For each synthesis, briefly summarise the characteristics and risk of bias among contributing studies. | Results; Risk of bias | |
| 20b | Present results of all statistical syntheses conducted. If meta-analysis was done, present for each the summary estimate and its precision (e.g. confidence/credible interval) and measures of statistical heterogeneity. If comparing groups, describe the direction of the effect. | Supplementary materials; Supplementary Tables and figures Tab 4-6. F 1 – 6 | |
| 20c | Present results of all investigations of possible causes of heterogeneity among study results. | Results; Bias Assessment Supplementary materials; Figure 2a-2b; | |
| 20d | Present results of all sensitivity analyses conducted to assess the robustness of the synthesized results. | Supplementary materials; Table 5 | |
| Reporting biases | 21 | Present assessments of risk of bias due to missing results (arising from reporting biases) for each synthesis assessed. | Supplementary materials; Table 5 | |
| Certainty of evidence | 22 | Present assessments of certainty (or confidence) in the body of evidence for each outcome assessed. | Supplementary materials; Table Table 5 | |
| **DISCUSSION** | | |  | |
| Discussion | 23a | Provide a general interpretation of the results in the context of other evidence. | Discussion | |
| 23b | Discuss any limitations of the evidence included in the review. | Discussion | |
| 23c | Discuss any limitations of the review processes used. | Discussion | |
| **OTHER INFORMATION** | | |  |  |
| Registration and protocol | 24a | Provide registration information for the review, including register name and registration number, or state that the review was not registered. | Methods | |
|  | 24b | Indicate where the review protocol can be accessed, or state that a protocol was not prepared. | Methods | |
|  | 24c | Describe and explain any amendments to information provided at registration or in the protocol. | N/A | |
| Support | 25 | Describe sources of financial or non-financial support for the review, and the role of the funders or sponsors in the review. | NA | |
| Competing interests | 26 | Declare any competing interests of review authors. | Conflicts of Interest | |
| Availability of data, code and other materials | 27 | Report which of the following are publicly available and where they can be found: template data collection forms; data extracted from included studies; data used for all analyses; analytic code; any other materials used in the review. | Data Availability statement | |

*From:* Moher D, Liberati A, Tetzlaff J, Altman DG, The PRISMA Group (2009). Preferred Reporting Items for Systematic Reviews and Meta-Analyses: The PRISMA Statement. PLoS Med 6(7): e1000097. doi:10.1371/journal.pmed1000097 For more information, visit: [**www.prisma-statement.org**](http://www.prisma-statement.org/).

**Supplementary table 2: Search strategy (Database searches were conducted from 2009 to 2025)**

| **Database** | **Query String** | **Records Found** |
| --- | --- | --- |
| PubMed | ("carbapenem resistance"[Mesh] OR "Drug Resistance, Microbial"[Mesh] OR "beta-Lactamases"[Mesh] OR (carbapenem*[tiab] AND (resistant OR resistance OR producing)[tiab]) OR carbapenemase*[tiab] OR CRE[tiab] OR CPE[tiab] OR CRAB[tiab] OR CRPA[tiab] OR NDM[tiab] OR OXA-48[tiab] OR VIM[tiab] OR IMP[tiab] OR KPC[tiab] ) AND ("Enterobacteriaceae"[Mesh] OR Enterobacterales[tiab] OR Enterobacteriaceae[tiab] OR "Klebsiella pneumoniae"[Mesh] OR Klebsiella[tiab]OR "Escherichia coli"[Mesh] OR "E. coli"[tiab]OR "Acinetobacter baumannii"[Mesh] OR Acinetobacter[tiab] OR "Pseudomonas aeruginosa"[Mesh] OR Pseudomonas[tiab]OR Enterobacter[tiab] OR Citrobacter[tiab] OR Serratia[tiab] OR Proteus[tiab] OR Morganella[tiab]) AND ("Saudi Arabia"[Mesh] OR "Saudi Arabia"[tiab] OR KSA[tiab] OR "United Arab Emirates"[tiab] OR UAE[tiab]OR Kuwait[tiab] OR Oman[tiab] OR Qatar[tiab] OR Bahrain[tiab]OR Yemen[tiab] OR Djibouti[tiab] OR Somalia[tiab] OR Ethiopia[tiab]) AND ("2009/01/01"[dp] : "2025/12/31"[dp]) | **887** |
| Scopus | (TITLE-ABS-KEY (carbapenem* OR carbapenemase* OR CRE OR CPE OR CRAB OR CRPA OR NDM OR OXA-48 OR KPC OR VIM OR IMP))AND (TITLE-ABS-KEY (Enterobacterales OR Enterobacteriaceae OR "Klebsiella pneumoniae" OR "Escherichia coli" OR "Acinetobacter baumannii" OR "Pseudomonas aeruginosa" OR Enterobacter OR Citrobacter OR Serratia OR Proteus OR Morganella)) AND (TITLE-ABS-KEY ("Saudi Arabia" OR "United Arab Emirates" OR UAE OR Kuwait OR Oman OR Qatar OR Bahrain OR Yemen OR Djibouti OR Somalia OR Ethiopia)) AND (PUBYEAR > 2019 AND PUBYEAR < 2025) | **174** |
| Web of Science | TS = (carbapenem* OR carbapenemase* OR CRE OR CPE OR CRAB OR CRPA OR NDM OR OXA-48 OR KPC OR VIM OR IMP)AND TS = (Enterobacterales OR Enterobacteriaceae OR "Klebsiella pneumoniae" OR "Escherichia coli" OR "Acinetobacter baumannii" OR "Pseudomonas aeruginosa" OR Enterobacter OR Citrobacter OR Serratia OR Proteus OR Morganella)AND TS = ("Saudi Arabia" OR "United Arab Emirates" OR Kuwait OR Oman OR Qatar OR Bahrain OR Yemen OR Djibouti OR Ethiopia) Refined by YEAR: 2009–2025 | **326** |
| Google Scholar | "carbapenem-resistant" OR "carbapenemase-producing" OR NDM OR OXA-48 OR KPC "Escherichia coli" OR "Klebsiella pneumoniae" OR "Acinetobacter baumannii" "Saudi Arabia" OR "United Arab Emirates" OR Kuwait OR Oman OR Qatar OR Bahrain OR Yemen OR Djibouti OR Ethiopia 2009..2025 | **111** |
|  | **Total Records Found** | **1742** |

**Supplementary table 3: Quality of included studies by JBI critical appraisal checklist for studies reporting prevalence data**

| **Study ID** | | **Checklist*** | | | | | | | | | **Overall** |
| --- | --- | --- | --- | --- | --- | --- | --- | --- | --- | --- | --- |
| **1** | **2** | **3** | **4** | **5** | **6** | **7** | **8** | **9** |
| 1 | Abdalhamid B (2014) | Y | Y | Y | Y | Y | Y | Y | Y | Y | 9 |
| 2 | Abdalhamid B (2017) | Y | Y | Y | Y | Y | Y | Y | Y | Y | 9 |
| 3 | Ahn C (2015) | Y | Y | N | Y | Y | Y | Y | Y | Y | 8 |
| 4 | Al-Agamy MH (2014) | Y | Y | N | Y | Y | Y | Y | Y | Y | 8 |
| 5 | Balkhy HH (2012) | Y | Y | Y | Y | Y | Y | Y | Y | Y | 9 |
| 6 | Dash N (2014) | Y | Y | Y | Y | Y | N | Y | Y | Y | 8 |
| 7 | Desta K (2016) | Y | Y | N | Y | Y | Y | Y | Y | Y | 8 |
| 8 | Elabd FM (2015) | Y | Y | Y | Y | Y | Y | Y | Y | Y | 9 |
| 9 | Eshetie S (2015) | Y | Y | Y | Y | N | N | Y | Y | Y | 7 |
| 10 | Gashaw M (2018) | Y | Y | Y | Y | Y | Y | Y | Y | Y | 9 |
| 11 | Jamal WY (2015) | Y | Y | N | Y | Y | Y | Y | Y | Y | 8 |
| 12 | Jamal WY (2016) | Y | Y | Y | Y | Y | Y | Y | Y | Y | 9 |
| 13 | Kandeel A (2015) | Y | Y | N | Y | Y | Y | Y | Y | Y | 8 |
| 14 | Khan MA (2016) | Y | Y | N | Y | Y | Y | Y | Y | Y | 8 |
| 15 | Khan MA (2019) | Y | N | N | Y | Y | Y | Y | Y | Y | 7 |
| 16 | Marie MA (2013) | Y | Y | N | Y | Y | Y | Y | Y | Y | 8 |
| 17 | Moubareck CA (2018) | Y | Y | N | Y | Y | Y | Y | Y | Y | 8 |
| 18 | Somily AM (2016) | Y | Y | Y | Y | Y | N | Y | Y | Y | 8 |
| 19 | Tawfik AF (2012) | Y | Y | Y | Y | Y | N | Y | Y | Y | 8 |
| 20 | Zowawi HM (2014) | Y | Y | Y | Y | Y | Y | Y | Y | Y | 9 |
| 21 | Mohamed HS (2023) | Y | Y | Y | Y | Y | Y | Y | Y | Y | 9 |
| 22 | Tekele SG (2021) | Y | Y | Y | Y | Y | Y | Y | Y | Y | 9 |
| 23 | Legese MH (2022) | Y | Y | N | Y | Y | Y | Y | Y | Y | 8 |
| 24 | Saeed NK (2019) | Y | Y | N | Y | Y | N | Y | Y | Y | 7 |
| 25 | Huang J (2024) | Y | Y | Y | Y | Y | Y | Y | Y | Y | 9 |
| 26 | Ragueh AA (2022) | Y | Y | Y | Y | Y | Y | Y | Y | Y | 9 |
| 27 | Shibabaw A (2023) | Y | Y | Y | Y | Y | Y | Y | Y | Y | 9 |
| 28 | Aloraifi RI (2023) | Y | Y | N | Y | Y | Y | N | Y | Y | 7 |
| 29 | Alzahrani OM (2022) | Y | Y | Y | Y | Y | Y | Y | Y | Y | 9 |
| 30 | Beyene D (2019) | Y | Y | Y | Y | Y | Y | Y | Y | Y | 9 |
| 31 | Moges F (2019) | Y | Y | Y | Y | Y | Y | Y | Y | Y | 9 |
| 32 | Seman A (2022) | Y | Y | N | Y | Y | Y | Y | Y | Y | 8 |
| 33 | Awoke T et al. (2022) | Y | Y | Y | Y | Y | Y | Y | Y | Y | 9 |
| 34 | Sid Ahmed MA et al. (2021) | Y | Y | N | Y | Y | Y | Y | Y | Y | 8 |
| 35 | Worku S et al. (2024) | Y | Y | N | Y | Y | Y | Y | Y | Y | 8 |
| 36 | Moghnia OH et al. (2021) | Y | Y | Y | Y | Y | Y | Y | Y | Y | 9 |
| 37 | Asmare Z et al. (2024) | Y | Y | Y | Y | Y | Y | Y | Y | Y | 9 |
| 38 | Al Fadhli AH et al. (2020) | Y | Y | Y | Y | Y | Y | Y | Y | Y | 9 |
| 39 | Mohamed HS et al. (2022) | Y | Y | N | Y | Y | Y | Y | Y | Y | 8 |
| 40 | Kasew D et al. (2023) | Y | Y | N | Y | Y | Y | Y | Y | Y | 8 |
| 41 | Amsalu G et al. (2024) | Y | Y | N | Y | Y | Y | Y | Y | Y | 8 |
| 42 | Beshah D et al. (2023) | Y | Y | Y | Y | Y | N | Y | Y | Y | 8 |
| 43 | Humaid, A. A, et al. (2024) | Y | Y | Y | Y | Y | Y | Y | Y | Y | 9 |
| 44 | Alyahawi, A, et al. (2018) | Y | Y | N | Y | Y | Y | Y | Y | Y | 8 |
| 45 | Balkhair A, Al Saadi K. (2023) | Y | Y | N | Y | Y | Y | Y | Y | Y | 8 |
| 46 | Balkhair A, et al. (2019) | Y | Y | N | Y | Y | Y | Y | Y | Y | 8 |

**Y, yes; N, no**

*** 1.** Appropriate sampling frame to address target population, **2.** Appropriate sampling way of study participants, **3.** Adequate sample size, **4.** Detail description of study participants and settings, **5.** Data analysis with sufficient coverage of identified sample, **6.** Use of valid methods to identify the condition, **7.** Standard, reliable way of measurement of condition for all participants, **8.** Availability of appropriate statistical analysis, **9.** Adequate response rate and management of low response rate.


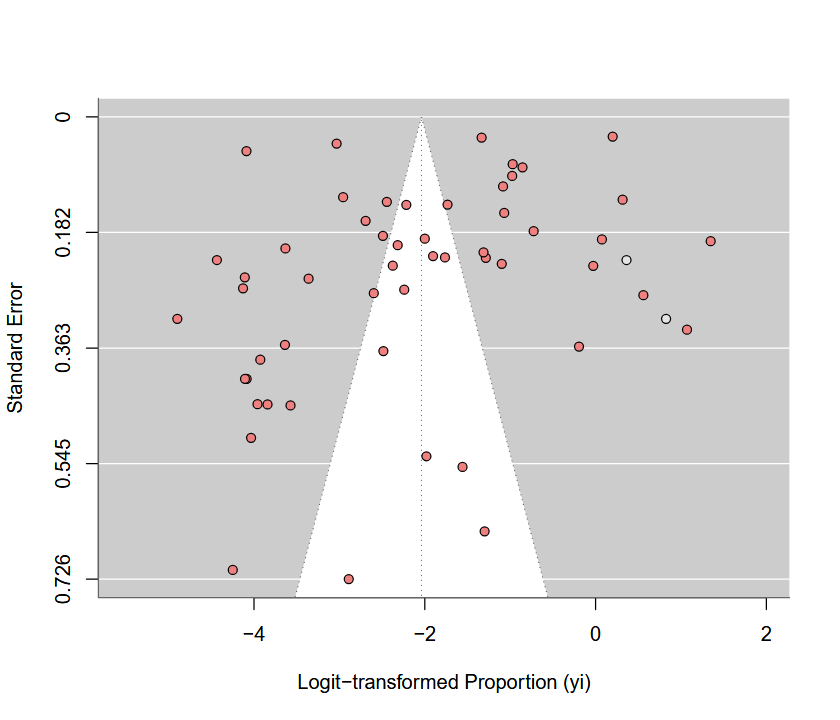


**Supplementary Figure 1. Funnel plot assessing publication bias**

Funnel plot of logit-transformed prevalence estimates against standard error. Asymmetry was assessed using Egger’s regression test and exploratory trim-and-fill analysis, indicating potential small-study effects.

**Supplementary table 5. Summary Analysis and pet_peese_summary**

- Test for Funnel Plot Asymmetry: z = -4.2536, p < .0001
- Limit Estimate (as sei -> 0): b = -0.9763 (CI: -1.6972, -0.2554)
- tau^2 (estimated amount of total heterogeneity): 2.0850 (SE = 0.4544)
- tau (square root of estimated tau^2 value): 1.4440
- I^2 (total heterogeneity / total variability): 99.42%
- H^2 (total variability / sampling variability): 172.28

| **method** | **pooled** | **ci_lb** | **ci_ub** |
| --- | --- | --- | --- |
| **REML** | 0.08804 | 0.0594 | 0.1286 |
| **PET** | 0.25214 | 0.15776 | 0.37768 |
| **PEESE** | 0.20521 | 0.14153 | 0.28792 |
| **TrimFill** | 0.10021 | 0.06748 | 0.14633 |

**Supplementary table 6. Leave-One-Out Meta-Analysis**

Influence analysis demonstrating the effect of sequential exclusion of individual studies on the pooled prevalence estimate. No single study disproportionately altered the overall estimate, supporting robustness of the findings.

| **Study_removed** | **Pooled_estimate** | **Pooled_CI_LB** | **Pooled_CI_UB** |
| --- | --- | --- | --- |
| Abdalhamid B | 0.08516 | 0.0572 | 0.12498 |
| Abdalhamid B | 0.09129 | 0.06155 | 0.13337 |
| Ahn C | 0.09088 | 0.06121 | 0.1329 |
| Al-Agamy MH | 0.08317 | 0.05653 | 0.12076 |
| Balkhy HH | 0.09196 | 0.06219 | 0.13393 |
| Dash N | 0.08845 | 0.05916 | 0.13023 |
| Desta K | 0.09081 | 0.06113 | 0.13285 |
| Elabd FM | 0.08385 | 0.0567 | 0.12231 |
| Eshetie S | 0.09012 | 0.06052 | 0.13216 |
| Gashaw M | 0.08582 | 0.05752 | 0.12618 |
| Jamal WY | 0.08914 | 0.05967 | 0.13113 |
| Jamal WY | 0.08818 | 0.05896 | 0.1299 |
| Kandeel A | 0.09277 | 0.06304 | 0.1345 |
| Khan MA | 0.08738 | 0.05842 | 0.12874 |
| Khan MA | 0.08613 | 0.05768 | 0.12673 |
| Marie MA | 0.08357 | 0.05661 | 0.12171 |
| Moubareck CA | 0.08929 | 0.05978 | 0.13132 |
| Somily AM | 0.09132 | 0.06157 | 0.13338 |
| Tawfik AF | 0.08782 | 0.05871 | 0.12936 |
| Zowawi HM | 0.0869 | 0.05811 | 0.128 |
| Mohamed HS | 0.08986 | 0.06027 | 0.13195 |
| Tekele SG | 0.09031 | 0.06067 | 0.1324 |
| Legese MH | 0.08795 | 0.0588 | 0.12957 |
| Saeed NK | 0.08864 | 0.05929 | 0.1305 |
| Huang J | 0.09135 | 0.06159 | 0.13345 |
| Ragueh AA | 0.08805 | 0.05887 | 0.1297 |
| Shibabaw A | 0.08697 | 0.05816 | 0.1281 |
| Aloraifi RI | 0.08618 | 0.05769 | 0.12683 |
| Alzahrani OM | 0.08555 | 0.05737 | 0.12571 |
| Beyene D | 0.0906 | 0.06094 | 0.13265 |
| Moges F | 0.08721 | 0.05831 | 0.12848 |
| Seman A | 0.08825 | 0.05903 | 0.12993 |
| Awoke T et al. | 0.08618 | 0.05771 | 0.12681 |
| Sid Ahmed MA et al. | 0.09083 | 0.06113 | 0.1329 |
| Worku S et al. | 0.08405 | 0.05677 | 0.12272 |
| Moghnia OH et al. | 0.08826 | 0.05902 | 0.13 |
| Asmare Z et al. | 0.09109 | 0.06138 | 0.13313 |
| Al Fadhli AH et al. | 0.08776 | 0.05867 | 0.12931 |
| Mohamed HS et al. | 0.09092 | 0.0613 | 0.13284 |
| Kasew D et al. | 0.0904 | 0.06073 | 0.13253 |
| Amsalu G et al. | 0.09112 | 0.06141 | 0.13316 |
| Beshah D et al. | 0.08574 | 0.05747 | 0.12605 |
| Humaid, A. A, et al. | 0.08342 | 0.05658 | 0.12135 |
| Alyahawi, A, et al. | 0.08575 | 0.05747 | 0.12608 |
| Balkhair A, Al Saadi K. | 0.08556 | 0.05738 | 0.12574 |
| Balkhair A, et al. | 0.08535 | 0.05728 | 0.12535 |

**Supplementary table 7. overall Gene Frequency Summary (All Studies): proportional distribution**

| **Carbapenemase Family** | **% of Studies Reporting** | **Key Variants** | **Dominant Regions** |
| --- | --- | --- | --- |
| **OXA-type** | ~70% | OXA-48-like, OXA-23, OXA-24/40/58 | KSA, Oman, Kuwait, UAE, Djibouti, Yemen |
| **NDM-type** | ~45% | NDM-1, NDM-5, NDM-7 | GCC + Horn of Africa |
| **VIM-type** | ~15% | VIM-1, VIM-4 | Qatar, Kuwait, KSA |
| **KPC-type** | ~8–10% | KPC-2 | Kuwait, Oman, UAE |
| **IMP-type** | <5% | IMP-1, IMP-4 | Bahrain, KSA, Oman |
